# Supplementary material for: Platelet function-guided modification in antiplatelet therapy after acute ischemic stroke is associated with clinical outcomes in patients with aspirin nonresponse
Source: PubMed Central journal article supplement (PMC5739731; doi:10.18632/oncotarget.22293), 2017-11-07
Supplement: oncotarget-08-106258-s001.pdf [file oncotarget-08-106258-s001.pdf]

## Platelet function-guided modification in antiplatelet therapy after acute ischemic stroke is associated with clinical outcomes in patients with aspirin nonresponse

### SUPPLEMENTARY MATERIALS

**Supplementary Table 1: Clinical outcomes in different antiplatelet therapy modification**

| Variable                         | changing aspirin<br>(n = 149) | adding clopidogrel<br>(n = 37) | increasing dose of aspirin<br>(n = 18) | P value |
|----------------------------------|-------------------------------|--------------------------------|----------------------------------------|---------|
| Ischemic events (n, %)           | 31 (20.8)                     | 8 (21.6)                       | 4 (22.2)                               | 0.97    |
| Ischemic stroke (n, %)           | 21 (14.1)                     | 5 (13.5)                       | 3 (16.7)                               | 0.96    |
| Transient ischemic attack (n, %) | 5 (3.4)                       | 2 (5.4)                        | 1 (5.6)                                | 0.81    |
| Myocardial infarction (n, %)     | 5 (3.4)                       | 1 (2.7)                        | 0 (0.0)                                | 0.59    |
| Any bleeding event               | 9 (6.0)                       | 10 (27.0)                      | 4 (22.2)                               | <0.001  |
| GUSTO minor (n, %)               | 3 (2.0)                       | 7 (18.9)                       | 2 (11.1)                               | <0.001  |
| GUSTO moderate (n, %)            | 4 (2.7)                       | 2 (5.4)                        | 2 (11.1)                               | 0.17    |
| GUSTO severe (n, %)              | 2 (1.3)                       | 1 (2.7)                        | 0 (0.0)                                | 0.71    |
| Gastrointestinal bleeding (n, %) | 7 (4.7)                       | 3 (8.1)                        | 2 (11.1)                               | 0.93    |
| Intracerebral hemorrhage (n, %)  | 1 (0.7)                       | 1 (2.7)                        | 0 (0.0)                                | 0.34    |
| Death (n, %)                     | 4 (2.7)                       | 2 (5.4)                        | 1 (5.6)                                | 0.64    |

GUSTO, Global Use of Strategies to Open Occluded Coronary Arteries

**Supplementary Table 2: Clinical outcomes in aspirin sensitive patients**

| Variable                         | Antiplatelet Therapy Modification |              | P value |
|----------------------------------|-----------------------------------|--------------|---------|
|                                  | No (n = 539)                      | Yes (n = 50) |         |
| Ischemic events (n, %)           | 115 (21.3)                        | 15 (3.0)     | 0.18    |
| Ischemic stroke (n, %)           | 74 (13.7)                         | 11 (22.0)    | 0.12    |
| Transient ischemic attack (n, %) | 26 (4.8)                          | 2 (4.0)      | 0.81    |
| Myocardial infarction (n, %)     | 15 (3.3)                          | 2 (4.0)      | 0.82    |
| Any bleeding event               | 54 (10.0)                         | 8 (16.0)     | 0.21    |
| GUSTO minor (n, %)               | 27 (5.0)                          | 3 (6.0)      | 0.76    |
| GUSTO moderate (n, %)            | 20 (3.7)                          | 4 (8.0)      | 0.13    |
| GUSTO severe (n, %)              | 7 (1.3)                           | 1 (2.0)      | 0.68    |
| Gastrointestinal bleeding (n, %) | 38 (7.1)                          | 3 (6.0)      | 0.79    |
| Intracerebral hemorrhage (n, %)  | 6 (1.1)                           | 1 (2.0)      | 0.54    |
| Death (n, %)                     | 16 (3.0)                          | 3 (6.0)      | 0.24    |

GUSTO, Global Use of Strategies to Open Occluded Coronary Arteries
